# Supplementary material
Source: PubMed Central journal article supplement (PMC3474282)
Supplement: cn300062w_si_001.pdf [file cn300062w_si_001.pdf]

# Supporting Information

## Selective Gelatinase Inhibitor Neuroprotective Agents Cross the Blood–Brain Barrier

Major Gooyit,<sup>†</sup> Mark A. Suckow,<sup>‡</sup> Valerie A. Schroeder,<sup>‡</sup> William R. Wolter,<sup>‡</sup> Shahriar Mobashery,<sup>†</sup> and Mayland Chang<sup>†\*</sup>

<sup>†</sup>Department of Chemistry and Biochemistry, University of Notre Dame, Notre Dame, Indiana 46556, USA

<sup>‡</sup>Freimann Life Sciences Center and Department of Biological Sciences, University of Notre Dame, Notre Dame, Indiana 46556, USA

**Table S1. Inter-day accuracy, precision, and relative error for SB-3CT and compounds 2-4 in spiked mouse brain samples**

| Day of Analysis | Low QC <sup>a</sup> |          |          |          | High QC (20 pmole/mg tissue) |          |          |          |
|-----------------|---------------------|----------|----------|----------|------------------------------|----------|----------|----------|
|                 | SB-3CT              | <b>2</b> | <b>3</b> | <b>4</b> | SB-3CT                       | <b>2</b> | <b>3</b> | <b>4</b> |
| 1               | 0.0728              | 0.0541   | 0.0709   | 0.0605   | 21.0                         | 21.4     | 18.1     | 20.5     |
|                 | 0.0875              | 0.0452   | 0.0862   | 0.0575   | 20.3                         | 21.1     | 20.3     | 20.6     |
|                 | 0.0784              | 0.0481   | 0.0775   | 0.0513   | 20.9                         | 21.4     | 18.7     | 20.9     |
| 2               | 0.0834              | 0.0594   | 0.0851   | 0.0595   | 17.2                         | 18.1     | 19.3     | 18.5     |
|                 | 0.0758              | 0.0641   | 0.0759   | 0.0424   | 21.5                         | 18.9     | 19.0     | 17.9     |
|                 | 0.0903              | 0.0493   | 0.0931   | 0.0379   | 19.2                         | 19.4     | 18.1     | 18.5     |
| 3               | 0.0851              | 0.0422   | 0.0875   | 0.0552   | 18.2                         | 19.6     | 18.9     | 20.2     |
|                 | 0.0763              | 0.0482   | 0.0766   | 0.0625   | 20.1                         | 18.8     | 21.4     | 21.6     |
|                 | 0.0918              | 0.0546   | 0.0739   | 0.0555   | 20.9                         | 18.2     | 19.5     | 20.2     |
| mean            | 0.0824              | 0.0517   | 0.0807   | 0.0536   | 19.9                         | 19.6     | 19.3     | 19.9     |
| s.d.            | 0.0068              | 0.0070   | 0.0074   | 0.0084   | 1.4                          | 1.3      | 1.1      | 1.4      |
| Precision, CV%  | 8.30                | 13.5     | 9.21     | 15.6     | 7.17                         | 6.72     | 5.53     | 6.80     |
| Accuracy%       | 82.4                | 103      | 80.7     | 107      | 99.7                         | 98.2     | 96.3     | 99.3     |
| Relative error% | 17.6                | 3.38     | 19.3     | 7.18     | 0.333                        | 1.77     | 3.70     | 0.731    |

<sup>a</sup> 0.10 pmole/mg tissue (for SB-3CT and compound **3**); 0.050 pmole/mg tissue (for compounds **2** and **4**)

**Table S2. Inter-day accuracy, precision, and relative error for SB-3CT and compounds 2-4 in spiked mouse plasma samples**

| Day of Analysis | Low QC <sup>a</sup> |        |        |        | Medium QC (2 µM) |      |        |      | High QC (20 µM) |      |      |      |
|-----------------|---------------------|--------|--------|--------|------------------|------|--------|------|-----------------|------|------|------|
|                 | SB-3CT              | 2      | 3      | 4      | SB-3CT           | 2    | 3      | 4    | SB-3CT          | 2    | 3    | 4    |
| 1               | 0.0895              | 0.0436 | 0.102  | 0.0424 | 1.90             | 1.88 | 1.90   | 2.10 | 20.4            | 20.7 | 21.1 | 20.2 |
|                 | 0.0875              | 0.0452 | 0.113  | 0.0381 | 1.70             | 2.06 | 1.83   | 2.02 | 21.5            | 20.9 | 17.7 | 21.1 |
|                 | 0.0999              | 0.0444 | 0.121  | 0.0454 | 1.86             | 1.95 | 2.10   | 2.10 | 20.3            | 19.8 | 19.2 | 21.7 |
|                 | 0.0835              | 0.0458 | 0.114  | 0.0437 | 1.95             | 2.02 | 1.96   | 2.04 | 20.9            | 20.9 | 18.3 | 21.7 |
|                 | 0.0752              | 0.0439 | 0.0983 | 0.0384 | 1.89             | 2.01 | 1.93   | 1.94 | 18.7            | 19.5 | 18.3 | 21.6 |
| 2               | 0.114               | 0.0466 | 0.0912 | 0.0403 | 1.81             | 2.03 | 1.91   | 2.01 | 20.6            | 22.1 | 18.0 | 21.3 |
|                 | 0.0863              | 0.0439 | 0.0940 | 0.0460 | 1.90             | 2.17 | 1.93   | 1.97 | 19.1            | 21.4 | 19.4 | 21.4 |
|                 | 0.106               | 0.0409 | 0.0854 | 0.0557 | 1.96             | 2.07 | 1.88   | 2.07 | 19.2            | 19.4 | 20.8 | 21.2 |
|                 | 0.0793              | 0.0518 | 0.102  | 0.0324 | 1.97             | 1.98 | 2.04   | 2.05 | 21.4            | 21.8 | 20.0 | 19.5 |
|                 | 0.0952              | 0.0472 | 0.0794 | 0.0393 | 1.79             | 2.03 | 1.84   | 1.92 | 20.8            | 19.3 | 19.5 | 19.0 |
| 3               | 0.0894              | 0.0443 | 0.0897 | 0.0561 | 1.98             | 1.99 | 2.20   | 1.93 | 21.5            | 20.0 | 22.3 | 21.4 |
|                 | 0.0980              | 0.0430 | 0.105  | 0.0596 | 2.12             | 1.76 | 2.26   | 2.08 | 22.4            | 21.0 | 24.7 | 22.0 |
|                 | 0.0982              | 0.0447 | 0.0852 | 0.0550 | 2.18             | 1.76 | 1.97   | 1.61 | 19.5            | 20.0 | 22.9 | 21.8 |
|                 | 0.102               | 0.0438 | 0.125  | 0.0532 | 2.16             | 1.72 | 2.19   | 1.92 | 20.4            | 19.4 | 23.9 | 21.3 |
|                 | 0.0985              | 0.0444 | 0.121  | 0.0501 | 1.83             | 1.88 | 2.04   | 1.91 | 22.7            | 21.5 | 25.5 | 21.6 |
| mean            | 0.0935              | 0.0449 | 0.102  | 0.0464 | 1.93             | 1.95 | 2.00   | 1.98 | 20.6            | 20.5 | 20.8 | 21.1 |
| s.d.            | 0.0104              | 0.0024 | 0.015  | 0.0081 | 0.14             | 0.13 | 0.14   | 0.12 | 1.2             | 0.9  | 2.5  | 0.9  |
| Precision, CV%  | 11.1                | 5.39   | 14.2   | 17.6   | 7.07             | 6.61 | 6.77   | 6.21 | 5.70            | 4.59 | 12.2 | 4.07 |
| Accuracy%       | 93.5                | 89.8   | 102    | 92.8   | 96.7             | 97.7 | 99.9   | 98.9 | 103             | 103  | 104  | 106  |
| Relative error% | 6.50                | 10.2   | 1.75   | 7.24   | 3.33             | 2.30 | 0.0667 | 1.10 | 3.14            | 2.53 | 3.88 | 5.54 |

<sup>a</sup> 0.10 µM (for SB-3CT and compound 3); 0.050 µM (for compounds 2 and 4)**Table S3. Extraction efficiency of SB-3CT and compounds 2-4 from mouse brain and plasma**

| Compound | Brain Recovery % (n = 5) |      |                              |      | Plasma Recovery % (n = 5) |      |                  |      |                 |      |
|----------|--------------------------|------|------------------------------|------|---------------------------|------|------------------|------|-----------------|------|
|          | Low QC <sup>a</sup>      |      | High QC (20 pmole/mg tissue) |      | Low QC <sup>b</sup>       |      | Medium QC (2 µM) |      | High QC (20 µM) |      |
|          | mean ± s.d.              | CV%  | mean ± s.d.                  | CV%  | mean ± s.d.               | CV%  | mean ± s.d.      | CV%  | mean ± s.d.     | CV%  |
| SB-3CT   | 89.1 ± 15.1              | 16.9 | 98.6 ± 4.3                   | 4.37 | 94.4 ± 6.6                | 6.95 | 105 ± 6          | 5.60 | 111 ± 5         | 4.88 |
| 2        | 91.4 ± 9.5               | 10.4 | 99.3 ± 2.2                   | 2.17 | 109 ± 7                   | 6.64 | 115 ± 5          | 4.11 | 116 ± 4         | 3.39 |
| 3        | 107 ± 18                 | 16.8 | 94.7 ± 1.7                   | 1.79 | 103 ± 9                   | 9.11 | 110 ± 11         | 9.62 | 102 ± 7         | 7.14 |
| 4        | 91.8 ± 7.1               | 7.69 | 99.7 ± 4.0                   | 3.98 | 104 ± 10                  | 9.71 | 102 ± 4          | 4.08 | 111 ± 4         | 4.06 |

<sup>a</sup> 0.10 pmole/mg tissue (for SB-3CT and compound 3); 0.050 pmole/mg tissue (for compounds 2 and 4)

<sup>b</sup> 0.10  $\mu$ M (for SB-3CT and compound 3); 0.050  $\mu$ M (for compounds 2 and 4)

**Table S4. Concentrations of SB-3CT and compound 2 after a single i.p. dose to female mice.**

| Time (min) | SB-3CT after Dose of SB-3CT |                     | Compound 2 after Dose of SB-3CT |                     | Compound 2 after Dose of Compound 2 |                     |
|------------|-----------------------------|---------------------|---------------------------------|---------------------|-------------------------------------|---------------------|
|            | Brain <sup>a</sup>          | Plasma <sup>b</sup> | Brain <sup>a</sup>              | Plasma <sup>b</sup> | Brain <sup>a</sup>                  | Plasma <sup>b</sup> |
| 10         | 5.0 $\pm$ 0.8               | 6.4 $\pm$ 0.3       | 0.054 $\pm$ 0.009               | 0.056 $\pm$ 0.010   | 6.1 $\pm$ 0.9                       | 9.2 $\pm$ 1.3       |
| 20         | 1.2 $\pm$ 0.1               | 2.3 $\pm$ 0.3       | 0.025 $\pm$ 0.006               | 0.015 $\pm$ 0.007   | 1.5 $\pm$ 0.6                       | 1.8 $\pm$ 0.8       |
| 30         | 0.92 $\pm$ 0.15             | 1.9 $\pm$ 0.2       | 0.022 $\pm$ 0.003               | 0.015 $\pm$ 0.003   | 0.22 $\pm$ 0.01                     | 0.32 $\pm$ 0.01     |
| 60         | 0.68 $\pm$ 0.15             | 1.1 $\pm$ 0.1       | 0.015 $\pm$ 0.006               | 0.0048 $\pm$ 0.0022 | 0.032 $\pm$ 0.023                   | 0.071 $\pm$ 0.021   |
| 90         | 0.26 $\pm$ 0.05             | 0.45 $\pm$ 0.12     | 0.015 $\pm$ 0.004               | 0.0036 $\pm$ 0.0019 | 0.016 $\pm$ 0.011                   | 0.037 $\pm$ 0.064   |
| 120        | 0.17 $\pm$ 0.02             | 0.17 $\pm$ 0.04     | 0.0081 $\pm$ 0.0020             | NQ <sup>c</sup>     | 0.0076 $\pm$ 0.0004                 | 0.019 $\pm$ 0.010   |
| 180        | 0.067 $\pm$ 0.043           | NQ <sup>c</sup>     | 0.0052 $\pm$ 0.0003             | NQ <sup>c</sup>     | 0.0018 $\pm$ 0.0032                 | NQ <sup>c</sup>     |

<sup>a</sup> Concentrations in pmole/mg tissue

<sup>b</sup> Concentrations in  $\mu$ M

<sup>c</sup> NQ = not quantifiable

**Table S5. Concentrations and pharmacokinetic parameters of compounds 3 and 4 after a single i.p. dose to female and male mice.**

| Time (min)                                  | Female Mice                |                     |                            |                     | Male Mice                  |                     |                            |                     |
|---------------------------------------------|----------------------------|---------------------|----------------------------|---------------------|----------------------------|---------------------|----------------------------|---------------------|
|                                             | Compound 3 after Dose of 3 |                     | Compound 4 after Dose of 3 |                     | Compound 3 after Dose of 3 |                     | Compound 4 after Dose of 3 |                     |
|                                             | Brain <sup>a</sup>         | Plasma <sup>b</sup> |
| 10                                          | 4.2 $\pm$ 0.2              | 0.81 $\pm$ 0.16     | 0.85 $\pm$ 0.10            | 0.33 $\pm$ 0.13     | 3.9 $\pm$ 0.4              | 0.50 $\pm$ 0.15     | 0.50 $\pm$ 0.02            | 0.085 $\pm$ 0.010   |
| 30                                          | 2.7 $\pm$ 0.7              | 0.40 $\pm$ 0.09     | 0.22 $\pm$ 0.18            | 0.078 $\pm$ 0.024   | 1.3 $\pm$ 0.2              | 0.31 $\pm$ 0.03     | 0.10 $\pm$ 0.03            | 0.027 $\pm$ 0.015   |
| 60                                          | 0.61 $\pm$ 0.36            | 0.14 $\pm$ 0.12     | 0.036 $\pm$ 0.015          | 0.015 $\pm$ 0.001   | 0.58 $\pm$ 0.05            | 0.16 $\pm$ 0.02     | 0.073 $\pm$ 0.037          | 0.010 $\pm$ 0.006   |
| 120                                         | 0.33 $\pm$ 0.06            | 0.071 $\pm$ 0.026   | 0.016 $\pm$ 0.003          | 0.0017 $\pm$ 0.0030 | 0.35 $\pm$ 0.06            | 0.14 $\pm$ 0.03     | 0.016 $\pm$ 0.003          | 0.0052 $\pm$ 0.0032 |
| 180                                         | 0.19 $\pm$ 0.03            | 0.045 $\pm$ 0.009   | 0.014 $\pm$ 0.001          | 0.0014 $\pm$ 0.0024 | 0.23 $\pm$ 0.05            | 0.080 $\pm$ 0.039   | 0.011 $\pm$ 0.004          | 0.0042 $\pm$ 0.0013 |
| 300                                         | 0.079 $\pm$ 0.088          | 0.023 $\pm$ 0.027   | 0.012 $\pm$ 0.001          | NQ <sup>c</sup>     | 0.084 $\pm$ 0.049          | 0.033 $\pm$ 0.057   | 0.0051 $\pm$ 0.0026        | 0.0031 $\pm$ 0.0025 |
| $AUC_{0-last}^d$                            | 200                        | 38.0                | 22.7                       | 7.75                | 164                        | 38.4                | 15.5                       | 3.28                |
| $AUC_{0-\infty}^d$                          | 211                        | 41.8                | 32.2                       | 8.13                | 174                        | 42.9                | 16.3                       | 4.52                |
| $t_{1/2\alpha}$ (min)                       | 32                         | 20                  | 10                         | 9.6                 | 13                         | 29                  | 8.6                        | 12                  |
| $t_{1/2\beta}$ (min)                        | 96                         | 114                 | 559                        | 187                 | 87                         | 94                  | 110                        | 277                 |
| Brain <sub>AUC</sub> /Plasma <sub>AUC</sub> | 5.0                        |                     | 4.0                        |                     | 4.1                        |                     | 3.6                        |                     |

<sup>a</sup> Concentrations in pmole/mg tissue

<sup>b</sup> Concentrations in  $\mu$ M

<sup>c</sup> NQ = not quantifiable

<sup>d</sup> *AUC* in pmole·min/mg for brain and in  $\mu\text{M}\cdot\text{min}$  for plasma
